# Supplementary material
Source: Springer Nature journal article supplement (https://www.springermedizin.de/resource/supplementary/12891_2011_1310_MOESM1_ESM.pdf/9507564)
Supplement: MOESM1 [file 9507564]

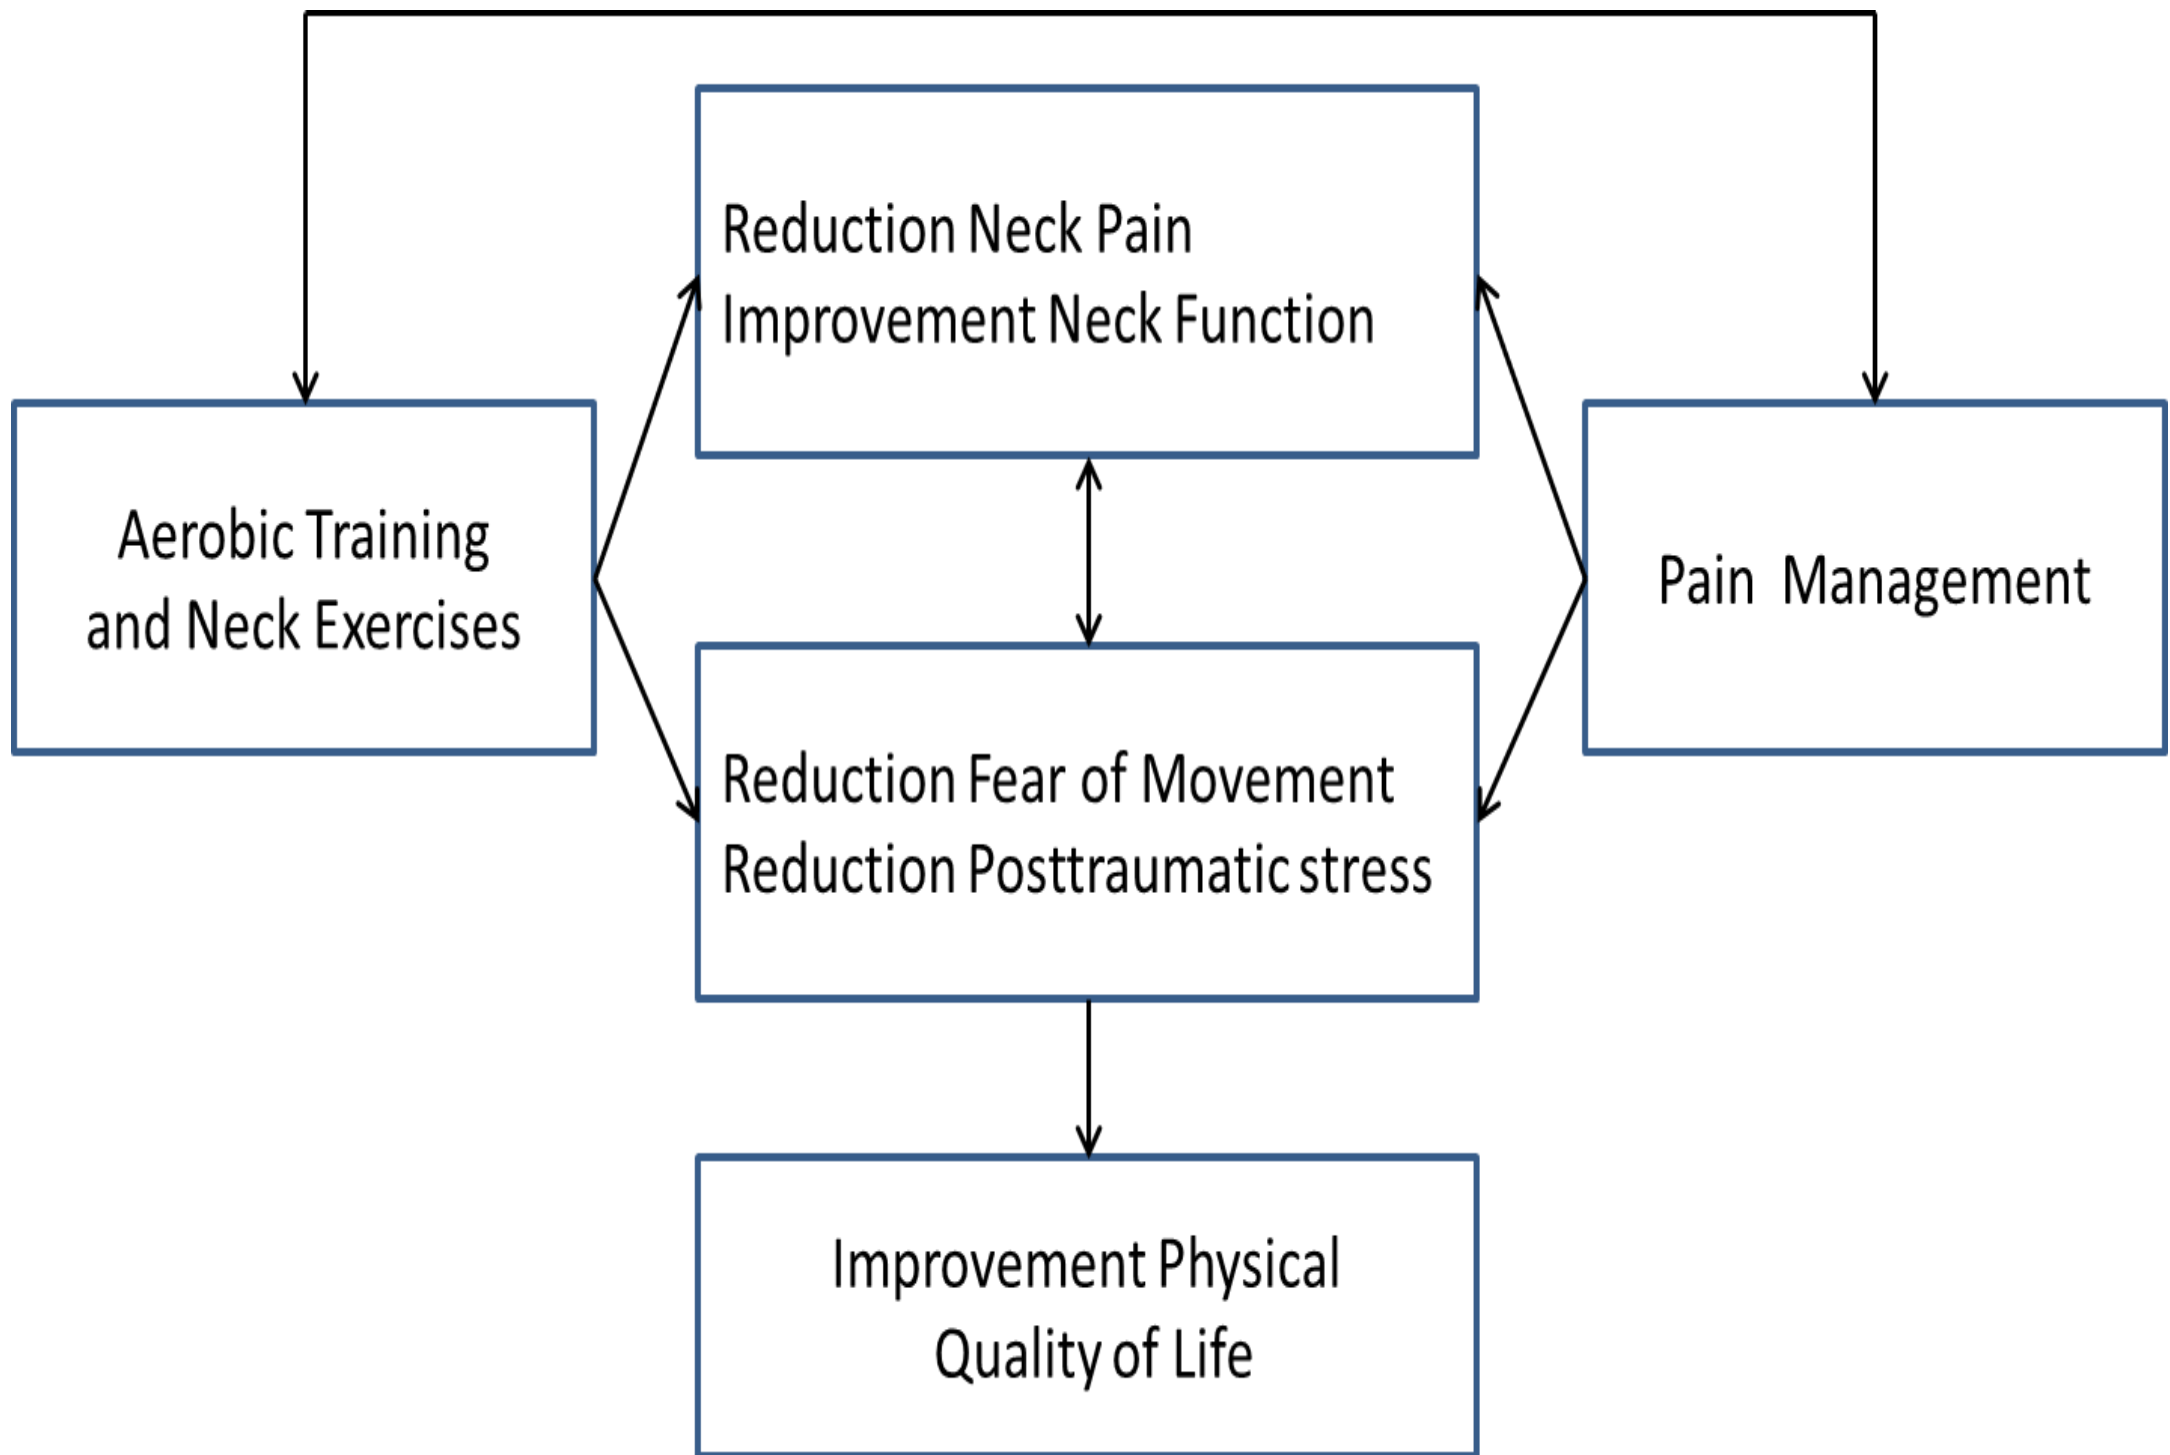

Aerobic Training  
and Neck Exercises

Reduction Neck Pain  
Improvement Neck Function

Reduction Fear of Movement  
Reduction Posttraumatic stress

Pain Management

Improvement Physical  
Quality of Life
